# Supplementary material for: Formation of H3O+ and OH by CO2 and N2O trace gases in the atmospheric environment
Source: Royal Society of Chemistry journal article supplement (doi:10.1039/d3cp02427j), 2023-01-01
Supplement: d3cp02427j1.pdf [file d3cp02427j1.pdf]

## SUPPORTING INFORMATION

### Formation of $\text{H}_3\text{O}^+$ and OH by $\text{CO}_2$ and $\text{N}_2\text{O}$ trace gases in the atmospheric environment

*Daniele Catone,<sup>a</sup> Mattea Carmen Castrovilli,<sup>b</sup> Francesca Nicolanti,<sup>c</sup> Mauro Satta,<sup>d,e\*</sup> Antonella Cartoni<sup>e\*</sup>*

a) Institute of Structure of Matter-CNR (ISM-CNR), Area della Ricerca di Tor Vergata, Via del Fosso del Cavaliere, Rome, Italy

b) Institute of Structure of Matter-CNR (ISM-CNR), Area della Ricerca di Roma 1, Via Salaria km 29.300, 00015, Monterotondo, Italy

c) Department of Physics, Sapienza University of Rome, P. le Aldo Moro 5, Rome, 00185, Italy

d) Institute for the Study of Nanostructured Materials-CNR (ISMN-CNR) co Department of Chemistry, Sapienza University of Rome, P. le Aldo Moro 5, Rome, 00185, Italy

e) Department of Chemistry, Sapienza University of Rome, P. le Aldo Moro 5, Rome, 00185, Italy

#### Corresponding Authors

\*A. Cartoni. E-mail: [antonella.cartoni@uniroma1.it](mailto:antonella.cartoni@uniroma1.it); Tel. + 39 06 49913678

\*M. Satta. E-mail: [mauro.satta@cnr.it](mailto:mauro.satta@cnr.it), Tel. + 39 06 49913381

## 1. Average Internal Energy Distribution upon Photoionization

The procedure to get the internal energy of  $\text{N}_2\text{O}$  upon photoionization, can be found in paragraph 2.1 of SI of [1]. We use measured Mass-Analyzed Threshold Ionization Spectroscopy (MATI) cross-sections [2] to obtain the average internal ( $E_{\text{INTER}}$ ) and kinetic ( $E_{\text{kin}}^{\text{el}}$ ) energy distribution upon photoionization of  $\text{N}_2\text{O}$  shown in Figure S1 :

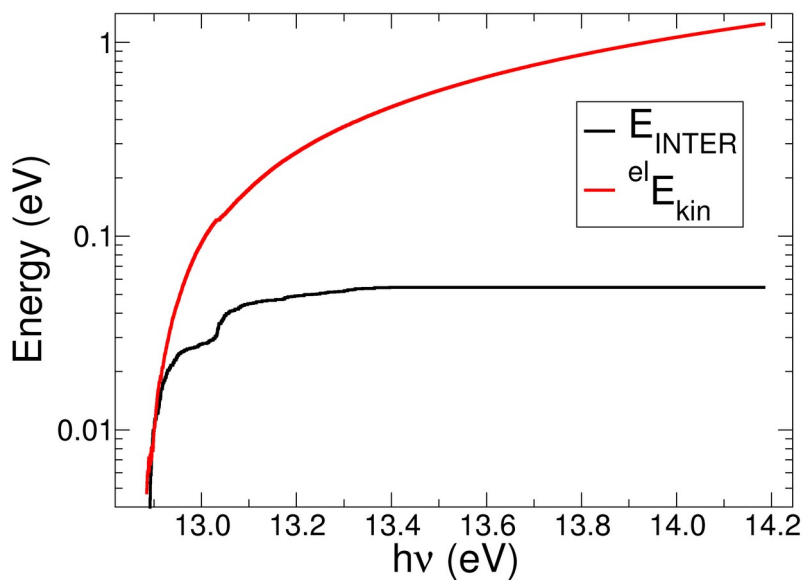

**Figure S1:** Average internal energy of the  $\text{N}_2\text{O}^+$  ion (black line) and average kinetic energy of the photoelectron (red line) as a function of the photoionization energy  $h\nu$ .

## 2. Rate Coefficients from mass spectra

The experimental measurement of mass intensities recorded as a function of photoionization energy of X (X=CO<sub>2</sub>, N<sub>2</sub>O) ion which reacts with the neutral H<sub>2</sub>O allows the determination of the rate coefficients of the reaction steps leading to the final products.

The network of exothermic reactions involving the X ion and H<sub>2</sub>O neutral molecules is the following:

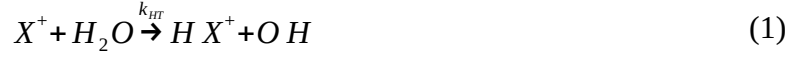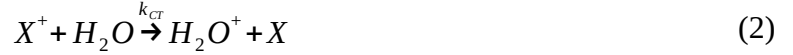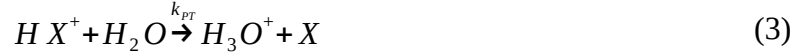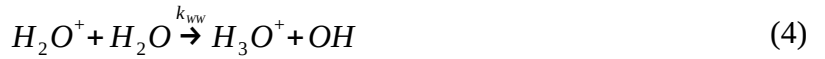

The values of the different rate coefficients (k) at room temperature has been taken from [3], and are reported in table S1

|                 | N <sub>2</sub> O                                | CO <sub>2</sub>                                 |
|-----------------|-------------------------------------------------|-------------------------------------------------|
| k <sub>HT</sub> | 2.10·10 <sup>-10</sup> ± 0.31·10 <sup>-10</sup> | 6.00·10 <sup>-10</sup> ± 0.90·10 <sup>-10</sup> |
| k <sub>CT</sub> | 1.89·10 <sup>-9</sup> ± 0.28·10 <sup>-9</sup>   | 1.80·10 <sup>-9</sup> ± 0.27·10 <sup>-9</sup>   |
| k <sub>PT</sub> | 2.83·10 <sup>-9</sup> ± 0.70·10 <sup>-9</sup>   | 2.65·10 <sup>-9</sup> ± 0.53·10 <sup>-9</sup>   |
| k <sub>WW</sub> | 2.05·10 <sup>-9</sup> ± 0.20·10 <sup>-9</sup>   | 2.05·10 <sup>-9</sup> ± 0.20·10 <sup>-9</sup>   |

**Table S1:** Rate coefficients (cm<sup>3</sup>s<sup>-1</sup>molecule<sup>-1</sup>) for the reaction networks at T=300K

In order to obtain the rate coefficients at photoionization energies greater than the IE, a kinetic model is developed based on the equations related to the network of reactions 1-4:

$$\frac{da_{X^+}}{dt} = -k_{HT} a_{X^+} \cdot a_{H_2O} - k_{CT} a_{X^+} \cdot a_{H_2O} \quad (5)$$

$$\frac{da_{HX^+}}{dt} = k_{HT} a_{X^+} \cdot a_{H_2O} - k_{PT} a_{HX^+} \cdot a_{H_2O} \quad (6)$$

$$\frac{da_{H_2O^+}}{dt} = k_{CT} a_{X^+} \cdot a_{H_2O} - k_{WW} a_{H_2O^+} \cdot a_{H_2O} \quad (7)$$

$$\frac{da_{H_3O^+}}{dt} = k_{PT} a_{HX^+} \cdot a_{H_2O} + k_{WW} a_{H_2O^+} \cdot a_{H_2O} \quad (8)$$

, where the activities (a) of the different molecular species are the number densities present in the experimental apparatus derived from measured pressures.

The analytical solution of the above system of differential equations is solved under the hypothesis that the activity of the neutral water is constant during the reactions, being the number

density of  $X^+$  ion negligible with respect to the neutral species. The activities of the ionic species are proportional to the mass intensities recorded at times  $t_F$ . The pseudo rate coefficient  $\gamma$  is defined as:  $\gamma=k_{HT}+k_{CT}$ .

$$a_{X^+}(t_F)=a_0 e^{-\gamma a_{H_2O} t_F} \quad (9)$$

$$a_{HX^+}(t_F)=\frac{a_0(\gamma-k_{CT})}{\gamma-k_{PT}}(e^{-k_{PT} a_{H_2O} t_F}-e^{-\gamma a_{H_2O} t_F}) \quad (10)$$

$$a_{H_2O^+}(t_F)=\frac{k_{CT} a_0}{\gamma-k_{WW}}(e^{-k_{WW} a_{H_2O} t_F}-e^{-\gamma a_{H_2O} t_F}) \quad (11)$$

$$a_{H_3O^+}(t_F)=a_0 \left( \frac{-(\gamma-k_{CT})}{\gamma-k_{PT}} e^{-k_{PT} a_{H_2O} t_F} + \frac{(\gamma-k_{CT})}{(\gamma-k_{PT})} e^{-\gamma a_{H_2O} t_F} - \frac{k_{CT}}{\gamma-k_{WW}} e^{-k_{WW} a_{H_2O} t_F} + \frac{k_{CT}}{(\gamma-k_{WW})} e^{-\gamma a_{H_2O} t_F} - e^{-\gamma a_{H_2O} t_F} + 1 \right) \quad (12)$$

The  $a_0$  coefficient is the sum of the number density of all the ions at time  $t_F$  :  $a_0=a_{X^+}(t_F)+a_{HX^+}(t_F)+a_{H_2O^+}(t_F)+a_{H_3O^+}(t_F)$ , and it is a time constant because of the charge conservation during the reactions, and it is equal to the initial number density of the  $X^+$  ion.

The evaluation of the rate coefficients for the reactions of  $X^+$  with water at each photon energies is based on the hypothesis that the reaction 3) and 4) are not affected by the internal energy of the initial photoexcited ion  $X^+$ , and that both  $H_2O$  and  $H_2O^+$  are at room temperature in the present experimental conditions. The rate coefficient  $k_{PT}$  and  $k_{WW}$  are considered constant with  $h\nu$ . This assumption is based on the fact that the fast charge exchange between  $X^+$  and water will produce a  $H_2O^+$  ion with an internal energy which is not much affected by the thermal content of the  $X^+$ . Instead, for reaction 3), this is considered to be in the collision regime: the Su-Chu Langevin rates [4] (see fig. S2) are  $K_L^{N_2O/CO_2}(300\text{ K})=2.490 \cdot 10^{-9} \text{ cm}^3\text{s}^{-1}\text{molecule}^{-1}$  which are within the error of the rate coefficient at room temperature (See tab S1).

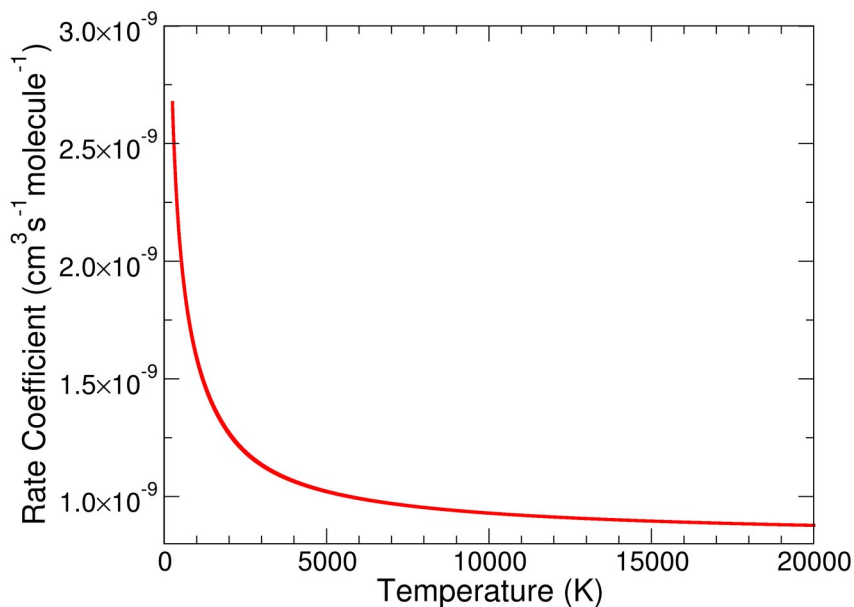

**Figure S2:** Collision rate coefficient for reaction 3) in the Su-Chu Langevin approximation

We have fixed the value of  $k_{PT}$  at its value at room temperature, and we have verified that lower values of  $k_{PT}$ , which occurs when the temperature increases, affect the rate coefficients of equations 1) and 2) within  $0.2 \cdot 10^{-9} \text{ cm}^3 \text{ s}^{-1} \text{ molecule}^{-1}$ , which is close to their errors.

This assumption will allow, by using of eqs. 9 and 10, the evaluation of  $k_{HT}(h\nu)$ ,  $k_{CT}(h\nu)$  at each photon energies  $h\nu$  by using the experimental mass of  $X^+$  and  $HX^+$ .

The  $t_F$  is evaluated by the solving the ratio of equation 9 and 10 and the experimental mass ratio  $m_X^+(t_F)/m_{HX^+}(t_F)$ , where  $\gamma$  is a known quantity at  $T=300\text{K}$  (see tab. 1), and  $a_{H_2O}$  is given by the partial pressure of  $H_2O$  and is reported in tab S2.

|                  | $P_{H_2O}$ (mbar)                         | $a_{H_2O}$ (molecule/cm <sup>3</sup> )    | $t_F$ (s)                                   | $a_o(h\nu=IE)$ |
|------------------|-------------------------------------------|-------------------------------------------|---------------------------------------------|----------------|
| CO <sub>2</sub>  | $4.3 \cdot 10^{-5} \pm 1.3 \cdot 10^{-5}$ | $1.0 \cdot 10^{12} \pm 0.3 \cdot 10^{12}$ | $1.25 \cdot 10^{-4} \pm 0.68 \cdot 10^{-4}$ | 23332.52963    |
| N <sub>2</sub> O | $8.2 \cdot 10^{-5} \pm 2.5 \cdot 10^{-5}$ | $2.0 \cdot 10^{12} \pm 0.6 \cdot 10^{12}$ | $7.78 \cdot 10^{-4} \pm 7.64 \cdot 10^{-4}$ | 1535.75705     |

**Table S2:** Final times of reaction for reaction of  $N_2O^+$  and  $CO_2^+$  with water. The error on the pressure is estimated as 30%.

The final times  $t_F$  allow to compute the total ions  $a_o$ : from eq. 9 we have calculated the total ions yields at  $h\nu=IE$ , as reported in tab. S2. The values of total ion yields at different photon energies are calculated by scaling with the  $\text{CO}_2$  (fig. S3) and  $\text{N}_2\text{O}$  (fig. S4) PES cross sections ( $\phi(h\nu)$ )  $a_o(h\nu)=a_o(IE)\cdot\phi(h\nu)/\phi(IE)$

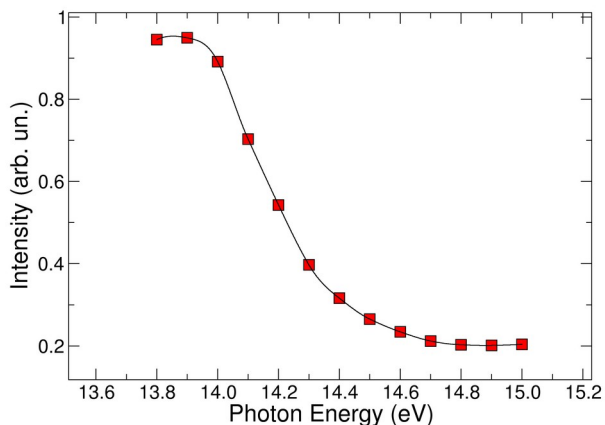

**Figure S3:** Photon-electron spectrum of  $\text{CO}_2$  shown from ionization energies up to 15 eV.

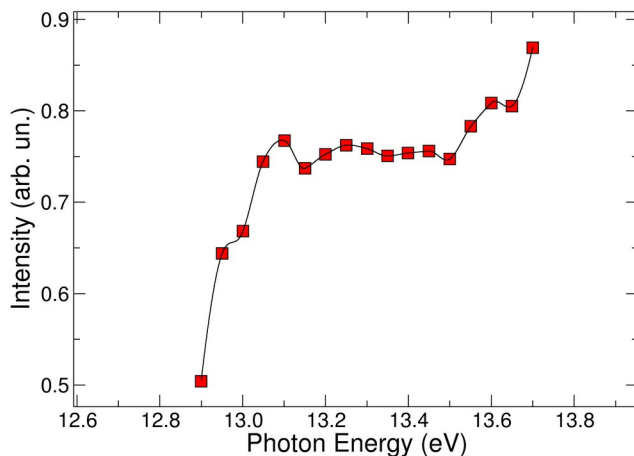

**Figure S4:** Photon-electron spectrum of  $\text{N}_2\text{O}$  shown from ionization energies up to 13.7 eV.

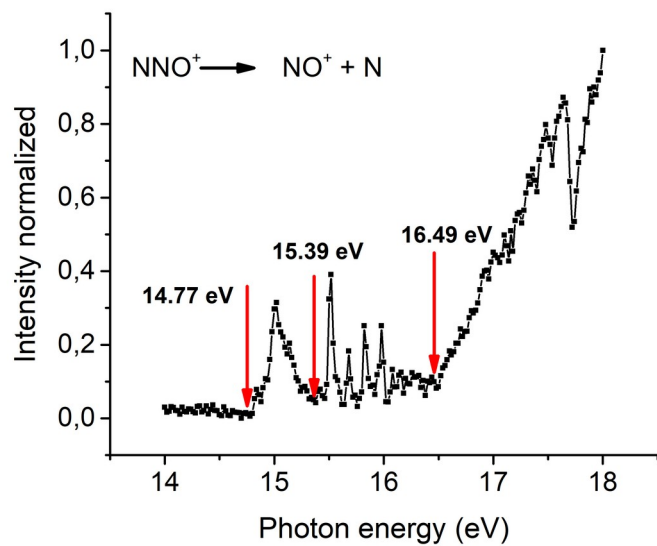

**Figure S5:** PIEC of  $\text{NO}^+$  from  $\text{N}_2\text{O}^+$

**Table S3:** Frequencies ( $\text{cm}^{-1}$ ) of the products of HT and CT reactions:

|                                           | <b><math>\text{N}_2\text{OH}^+</math></b> | <b>Vibrational Mode</b>  |
|-------------------------------------------|-------------------------------------------|--------------------------|
| $\nu_1$                                   | 437                                       | NNO in plane bending     |
| $\nu_2$                                   | 488                                       | NNO out of plane bending |
| $\nu_3$                                   | 1063                                      | NO stretching            |
| $\nu_4$                                   | 1377                                      | HON in plane bending     |
| $\nu_5$                                   | 2325                                      | NN stretching            |
| $\nu_6$                                   | 3472                                      | OH stretching            |
| <b><math>\text{N}_2\text{O}</math></b>    |                                           |                          |
| $\nu_1$                                   | 599                                       | Bending                  |
| $\nu_2$                                   | 599                                       | Bending                  |
| $\nu_3$                                   | 1297                                      | Symm. stretching         |
| $\nu_4$                                   | 2260                                      | Asymm. stretching        |
| <b><math>\text{H}_2\text{O}^+</math></b>  |                                           |                          |
| $\nu_1$                                   | 1457                                      | Bending                  |
| $\nu_2$                                   | 3358                                      | Symm. stretching         |
| $\nu_3$                                   | 3411                                      | Asymm. stretching        |
| <b>OH</b>                                 |                                           |                          |
| $\nu_1$                                   | 3737                                      | OH stretching            |
| <b><math>\text{CO}_2\text{H}^+</math></b> |                                           |                          |
| $\nu_1$                                   | 540                                       | OCO in plane bending     |
| $\nu_2$                                   | 590                                       | OCO out of plane bending |
| $\nu_3$                                   | 1036                                      | HOC in plane bending     |
| $\nu_4$                                   | 1252                                      | Symm. OCO stretching     |
| $\nu_5$                                   | 2427                                      | Asymm. OCO stretching    |
| $\nu_6$                                   | 3524                                      | OH stretching            |
| <b><math>\text{CO}_2</math></b>           |                                           |                          |
| $\nu_1$                                   | 666                                       | Bending                  |
| $\nu_2$                                   | 666                                       | Bending                  |
| $\nu_3$                                   | 1341                                      | Symm. stretching         |
| $\nu_4$                                   | 2384                                      | Asymm. stretching        |



**Table S4.** Energy distribution of the products for HT channel:  $\text{CO}_2^+ + \text{H}_2\text{O} \rightarrow \text{HCO}_2^+ + \text{OH}$ 

| <b>h<math>\nu</math></b><br><b>(eV)</b> | <b>HCO<math>_2^+</math></b>                                          |                                  |                                              | <b>OH</b>                                    |
|-----------------------------------------|----------------------------------------------------------------------|----------------------------------|----------------------------------------------|----------------------------------------------|
|                                         | <b>Vibrational</b><br><b>Energy</b><br><b>(cm<math>^{-1}</math>)</b> | <b>Mode</b><br><b>excitation</b> | <b>Kinetic Energy (cm<math>^{-1}</math>)</b> | <b>Kinetic Energy (cm<math>^{-1}</math>)</b> |
| 13.8                                    | 2850                                                                 | $2\nu_1+3\nu_2$                  | 850                                          | 2250                                         |
| 13.9                                    | 2382                                                                 | $\nu_1+\nu_2+\nu_4$              | 1024                                         | 2712                                         |
| 14.0                                    | 2756                                                                 | $\nu_1+2\nu_2+\nu_3$             | 1016                                         | 2690                                         |
| 14.1                                    | 2662                                                                 | $\nu_2+2\nu_3$                   | 1075                                         | 2846                                         |
| 14.2                                    | 2967                                                                 | $\nu_1+\nu_5$                    | 1020                                         | 2701                                         |
| 14.3                                    | 3412                                                                 | $4\nu_1+\nu_4$                   | 907                                          | 2400                                         |
| 14.4                                    | 3152                                                                 | $2\nu_1+2\nu_3$                  | 992                                          | 2626                                         |
| 14.5                                    | 3108                                                                 | $3\nu_3$                         | 1015                                         | 2686                                         |
| 14.6                                    | 3108                                                                 | $3\nu_3$                         | 1031                                         | 2729                                         |
| 14.7                                    | 3412                                                                 | $4\nu_1+\nu_4$                   | 955                                          | 2527                                         |
| 14.8                                    | 2872                                                                 | $3\nu_1+\nu_4$                   | 1117                                         | 2955                                         |
| 14.9                                    | 3240                                                                 | $6\nu_1$                         | 1030                                         | 2726                                         |
| 15.0                                    | 3390                                                                 | $3\nu_1+3\nu_2$                  | 1009                                         | 2670                                         |

**Table S5.** Energy distribution of the products for CT channel:  $\text{CO}_2^+ + \text{H}_2\text{O} \rightarrow \text{CO}_2 + \text{H}_2\text{O}^+$ 

| hv<br>(eV) | CO <sub>2</sub>                              |                                                  |                                          | H <sub>2</sub> O <sup>+</sup>                |                                |                                          |
|------------|----------------------------------------------|--------------------------------------------------|------------------------------------------|----------------------------------------------|--------------------------------|------------------------------------------|
|            | Vibrational<br>Energy<br>(cm <sup>-1</sup> ) | Mode<br>excitation                               | Kinetic<br>Energy<br>(cm <sup>-1</sup> ) | Vibrational<br>Energy<br>(cm <sup>-1</sup> ) | Mode<br>excitation             | Kinetic<br>Energy<br>(cm <sup>-1</sup> ) |
| 13.8       | 8010                                         | 8v <sub>1</sub> +2v <sub>3</sub>                 | 646                                      | 0                                            |                                | 1578                                     |
| 13.9       | 8658                                         | 13v <sub>1</sub>                                 | 506                                      | 0                                            |                                | 1238                                     |
| 14.0       | 8405                                         | 3v <sub>1</sub> +3v <sub>3</sub> +v <sub>4</sub> | 257                                      | 1457                                         | v <sub>1</sub>                 | 627                                      |
| 14.1       | 4391                                         | v <sub>1</sub> +v <sub>3</sub> +v <sub>4</sub>   | 467                                      | 4868                                         | v <sub>1</sub> +v <sub>3</sub> | 1141                                     |
| 14.2       | 8387                                         | 7v <sub>1</sub> +v <sub>3</sub> +v <sub>4</sub>  | 327                                      | 1457                                         | v <sub>1</sub>                 | 801                                      |
| 14.3       | 8387                                         | 7v <sub>1</sub> +v <sub>3</sub> +v <sub>4</sub>  | 336                                      | 1457                                         | v <sub>1</sub>                 | 823                                      |
| 14.4       | 7450                                         | 2v <sub>3</sub> +2v <sub>4</sub>                 | 623                                      | 1457                                         | v <sub>1</sub>                 | 1524                                     |
| 14.5       | 10132                                        | 4v <sub>3</sub> +2v <sub>4</sub>                 | 279                                      | 0                                            |                                | 682                                      |
| 14.6       | 9737                                         | 5v <sub>1</sub> +3v <sub>3</sub> +v <sub>4</sub> | 411                                      | 0                                            |                                | 1004                                     |
| 14.7       | 9430                                         | 7v <sub>1</sub> +2v <sub>4</sub>                 | 507                                      | 0                                            |                                | 1241                                     |
| 14.8       | 7073                                         | v <sub>1</sub> +3v <sub>3</sub> +v <sub>4</sub>  | 360                                      | 2914                                         | 2v <sub>1</sub>                | 881                                      |
| 14.9       | 4671                                         | 5v <sub>1</sub> +v <sub>3</sub>                  | 505                                      | 4868                                         | v <sub>1</sub> +v <sub>3</sub> | 1236                                     |
| 15.0       | 6389                                         | 4v <sub>1</sub> +v <sub>3</sub> +v <sub>4</sub>  | 451                                      | 3411                                         | v <sub>3</sub>                 | 1102                                     |

**Table S6.** Energy distribution of the products for HT channel:  $\text{N}_2\text{O}^+ + \text{H}_2\text{O} \rightarrow \text{N}_2\text{OH}^+ + \text{OH}$ 

| <b>h<math>\nu</math></b><br><b>(eV)</b> | <b>N<sub>2</sub>OH<sup>+</sup></b>                              |                                  |                                                             | <b>OH</b>                                                   |
|-----------------------------------------|-----------------------------------------------------------------|----------------------------------|-------------------------------------------------------------|-------------------------------------------------------------|
|                                         | <b>Vibrational</b><br><b>Energy</b><br><b>(cm<sup>-1</sup>)</b> | <b>Mode</b><br><b>excitation</b> | <b>Kinetic</b><br><b>Energy</b><br><b>(cm<sup>-1</sup>)</b> | <b>Kinetic</b><br><b>Energy</b><br><b>(cm<sup>-1</sup>)</b> |
| 12.90                                   | 437                                                             | $\nu_1$                          | 468                                                         | 1238                                                        |
| 12.95                                   | 0                                                               |                                  | 619                                                         | 1638                                                        |
| 13.00                                   | 0                                                               |                                  | 627                                                         | 1658                                                        |
| 13.05                                   | 437                                                             | $\nu_1$                          | 532                                                         | 1407                                                        |
| 13.10                                   | 437                                                             | $\nu_1$                          | 545                                                         | 1441                                                        |
| 13.15                                   | 0                                                               |                                  | 668                                                         | 1770                                                        |
| 13.20                                   | 437                                                             | $\nu_1$                          | 554                                                         | 1468                                                        |
| 13.25                                   | 437                                                             | $\nu_1$                          | 558                                                         | 1477                                                        |
| 13.30                                   | 437                                                             | $\nu_1$                          | 560                                                         | 1483                                                        |
| 13.35                                   | 437                                                             | $\nu_1$                          | 564                                                         | 1494                                                        |
| 13.40                                   | 0                                                               |                                  | 686                                                         | 1815                                                        |
| 13.45                                   | 0                                                               |                                  | 686                                                         | 1815                                                        |
| 13.50                                   | 437                                                             | $\nu_1$                          | 566                                                         | 1498                                                        |
| 13.55                                   | 437                                                             | $\nu_1$                          | 566                                                         | 1498                                                        |
| 13.60                                   | 0                                                               |                                  | 686                                                         | 1815                                                        |
| 13.65                                   | 437                                                             | $\nu_1$                          | 566                                                         | 1498                                                        |
| 13.70                                   | 437                                                             | $\nu_1$                          | 566                                                         | 1498                                                        |

**Table S7.** Energy distribution of the products for CT channel:  $\text{N}_2\text{O}^+ + \text{H}_2\text{O} \rightarrow \text{N}_2\text{O} + \text{H}_2\text{O}^+$ 

| hv<br>(eV) | $\text{N}_2\text{O}$                          |                    |                                        | $\text{H}_2\text{O}^+$                 |
|------------|-----------------------------------------------|--------------------|----------------------------------------|----------------------------------------|
|            | Vibrational<br>Energy<br>( $\text{cm}^{-1}$ ) | Mode<br>excitation | Kinetic Energy<br>( $\text{cm}^{-1}$ ) | Kinetic Energy<br>( $\text{cm}^{-1}$ ) |
| 12.90      | 1896                                          | $\nu_1+\nu_3$      | 445                                    | 1087                                   |
| 12.95      | 2495                                          | $2\nu_1+\nu_3$     | 304                                    | 744                                    |
| 13.00      | 2495                                          | $2\nu_1+\nu_3$     | 312                                    | 764                                    |
| 13.05      | 2260                                          | $\nu_4$            | 407                                    | 995                                    |
| 13.10      | 1896                                          | $\nu_1+\nu_3$      | 526                                    | 1287                                   |
| 13.15      | 2260                                          | $\nu_4$            | 425                                    | 1039                                   |
| 13.20      | 1797                                          | $3\nu_1$           | 566                                    | 1382                                   |
| 13.25      | 2260                                          | $\nu_4$            | 435                                    | 1063                                   |
| 13.30      | 2260                                          | $\nu_4$            | 437                                    | 1069                                   |
| 13.35      | 2396                                          | $4\nu_1$           | 402                                    | 983                                    |
| 13.40      | 2260                                          | $\nu_4$            | 443                                    | 1084                                   |
| 13.45      | 2260                                          | $\nu_4$            | 443                                    | 1084                                   |
| 13.50      | 1896                                          | $\nu_1+\nu_3$      | 549                                    | 1342                                   |
| 13.55      | 1896                                          | $\nu_1+\nu_3$      | 549                                    | 1342                                   |
| 13.60      | 1797                                          | $3\nu_1$           | 578                                    | 1412                                   |
| 13.65      | 1797                                          | $3\nu_1$           | 578                                    | 1412                                   |
| 13.70      | 1896                                          | $\nu_1+\nu_3$      | 549                                    | 1342                                   |

### 3. Radiative Power

The vibrational radiative power emission has been evaluated by using the HITEMP database [5]. In particular the most abundant isotope composition has been selected for both CO<sub>2</sub> and N<sub>2</sub>O molecules. The cutoff of the intensity of the lines has been put at 10<sup>-32</sup> cm<sup>-1</sup>/(molecule cm<sup>-2</sup>) after proper verification of convergence. The radiative power for each vibrational excited state defined by the triplet  $\nu_1, \nu_2, \nu_3$  has been evaluated with the following equation:

$$RP(\nu_1, \nu_2, \nu_3) = \frac{\sum_i A_i S_i \nu_i e^{-E_i^{\text{rot}}/KT^{\text{rot}}}}{\sum_i A_i S_i g_i e^{-E_i^{\text{rot}}/KT^{\text{rot}}}} \quad (13)$$

where for each energy transition  $i$  whose upper vibrational state belongs to the  $\nu_1, \nu_2, \nu_3$  triplet,  $A_i$  is the Einstein spontaneous emission coefficient in s<sup>-1</sup>,  $S_i$  is the intensity in cm<sup>-1</sup>/(molecule cm<sup>-2</sup>),  $\nu_i$  is the emission frequency in cm<sup>-1</sup>,  $g_i$  is the statistical weight of the upper state,  $T^{\text{rot}}$  is the rotational temperature,  $E_i^{\text{rot}}$  is the upper state rotational energy, and is given by the difference between the upper state energy and the vibrational energy of the upper state. On the other hand, the thermal vibrational radiative power is defined as:

$$TRP(T) = \frac{\sum_i A_i S_i \nu_i e^{-E_i/KT}}{\sum_i A_i S_i g_i e^{-E_i/KT}} \quad (14)$$

where  $E_i$  is the ro-vibrational energy of the  $i$  transition, and the sum is over all the transitions. The state selected radiative lifetimes are calculated with the following equation:

$$\tau(\nu_1, \nu_2, \nu_3) = \frac{\sum_i A_i S_i e^{-E_i^{\text{rot}}/KT^{\text{rot}}}}{\sum_i A_i S_i g_i e^{-E_i^{\text{rot}}/KT^{\text{rot}}}} \quad (15)$$

The thermal radiative lifetimes are given by following equation:

$$\tau_{TH}(T) = \frac{\sum_i A_i S_i e^{-E_i/KT}}{\sum_i A_i S_i g_i e^{-E_i/KT}} \quad (16)$$

**Table S8:** Vibrational energies and temperature at different photon energies for CO<sub>2</sub>.

| <b>hν<br/>(eV)</b> | <b>Vibrational<br/>Energy<br/>(cm<sup>-1</sup>)</b> | <b>Vibrational<br/>Temperature (K)</b> | <b>Radiative Power<br/>(W/molecule)</b> | <b>Radiative<br/>Lifetime (s)</b> |
|--------------------|-----------------------------------------------------|----------------------------------------|-----------------------------------------|-----------------------------------|
| 13.8               | 8010                                                | 3694                                   | $3.62 \cdot 10^{-19}$                   | 1402.73                           |
| 13.9               | 8658                                                | 3933                                   | 0.00                                    | //                                |
| 14.0               | 8405                                                | 3840                                   | $1.05 \cdot 10^{-17}$                   | 42.19                             |
| 14.1               | 4391                                                | 2339                                   | $3.52 \cdot 10^{-16}$                   | 1.02                              |
| 14.2               | 8387                                                | 3833                                   | $2.68 \cdot 10^{-16}$                   | 1.27                              |
| 14.3               | 8387                                                | 3833                                   | $2.68 \cdot 10^{-16}$                   | 1.27                              |
| 14.4               | 7450                                                | 3487                                   | $1.08 \cdot 10^{-16}$                   | 3.75                              |
| 14.5               | 10132                                               | 4474                                   | $2.87 \cdot 10^{-18}$                   | 206.47                            |
| 14.6               | 9737                                                | 4329                                   | $6.23 \cdot 10^{-18}$                   | 86.30                             |
| 14.7               | 9430                                                | 4217                                   | $1.09 \cdot 10^{-16}$                   | 2.88                              |
| 14.8               | 7073                                                | 3347                                   | $1.11 \cdot 10^{-17}$                   | 41.14                             |
| 14.9               | 4671                                                | 2446                                   | $8.76 \cdot 10^{-18}$                   | 10.59                             |
| 15.0               | 6389                                                | 3093                                   | $3.03 \cdot 10^{-16}$                   | 1.15                              |

Data from HITEMP database: Thermal distribution at T=250K radiative power (TRP)  $5.67 \cdot 10^{-18}$  W/molecule, lifetime ( $\tau_{\text{TH}}$ )= 21.19 s. The rotational temperature is fixed at 250K

**Table S9:** Vibrational energies and temperature at different photon energies for N<sub>2</sub>O

| <b>hν<br/>(eV)</b> | <b>Vibrational<br/>Energy<br/>(cm<sup>-1</sup>)</b> | <b>Vibrational<br/>Temperature<br/>(K)</b> | <b>Radiative<br/>Power<br/>(W/molecule)</b> | <b>Radiative Lifetime (s)</b> |
|--------------------|-----------------------------------------------------|--------------------------------------------|---------------------------------------------|-------------------------------|
| 12.90              | 1896                                                | 1307                                       | 4.46·10 <sup>-18</sup>                      | 40.19                         |
| 12.95              | 2495                                                | 1555                                       | 1.83·10 <sup>-18</sup>                      | 122.03                        |
| 13.00              | 2495                                                | 1555                                       | 1.83·10 <sup>-18</sup>                      | 122.03                        |
| 13.05              | 2260                                                | 1459                                       | 1.33·10 <sup>-16</sup>                      | 2.31                          |
| 13.10              | 1896                                                | 1307                                       | 4.46·10 <sup>-18</sup>                      | 40.19                         |
| 13.15              | 2260                                                | 1459                                       | 1.33·10 <sup>-16</sup>                      | 2.31                          |
| 13.20              | 1797                                                | 1264                                       | 1.37·10 <sup>-19</sup>                      | 1079.8                        |
| 13.25              | 2260                                                | 1459                                       | 1.33·10 <sup>-16</sup>                      | 2.31                          |
| 13.30              | 2260                                                | 1459                                       | 1.33·10 <sup>-16</sup>                      | 2.31                          |
| 13.35              | 2396                                                | 1515                                       | 9.57·10 <sup>-20</sup>                      | 2276.67                       |
| 13.40              | 2260                                                | 1459                                       | 1.33·10 <sup>-16</sup>                      | 2.31                          |
| 13.45              | 2260                                                | 1459                                       | 1.33·10 <sup>-16</sup>                      | 2.31                          |
| 13.50              | 1896                                                | 1307                                       | 4.46·10 <sup>-18</sup>                      | 40.19                         |
| 13.55              | 1896                                                | 1307                                       | 4.46·10 <sup>-18</sup>                      | 40.19                         |
| 13.60              | 1797                                                | 1264                                       | 1.37·10 <sup>-19</sup>                      | 1079.8                        |
| 13.65              | 1797                                                | 1264                                       | 1.37·10 <sup>-19</sup>                      | 1079.8                        |
| 13.70              | 1896                                                | 1307                                       | 4.46·10 <sup>-18</sup>                      | 40.19                         |

Data from HITEMP [ref] database: at T=250K radiative power (TRP) 9.64·10<sup>-19</sup> W/molecule, lifetime ( $\tau_{\text{TH}}$ ) 216.51 s. The rotational temperature is fixed at 250K

## References:

- [1] Mauro Satta, Antonella Cartoni, Daniele Catone, Mattea Carmen Castrovilli, Paola Bolognesi, Nicola Zema and Lorenzo Avaldi. “The Reaction of Sulfur Dioxide Radical Cation with Hydrogen and its Relevance in Solar Geoengineering Models”, *ChemPhysChem* **21** 1146-1156 (2020).
- [2] Oleg Kostko, Sang Kyu Kim, Stephen R. Leone, and Musahid Ahmed. “Mass-Analyzed Threshold Ionization (MATI) Spectroscopy of Atoms and Molecules Using VUV Synchrotron Radiation”, *J. Phys. Chem. A*, **113**, 14206–14211 (2009).
- [3] V. G. Anicich, *J. Phys. Chem. Ref. Data*, **22**, 1469–1569 (1993).
- [4] T. Su, W. J. Chesnavich, *J. Chem. Phys.*, **76**, 5183–5185 (1982).
- [5] L. S. Rothman, I. E. Gordon, R. J. Barber, H. Dothe, R. R. Gamache, A. Goldman, V. Perevalov, S. A. Tashkun, J. Tennyson, "HITEMP, the high-temperature molecular spectroscopic database", *J. Quant. Spectrosc. Radiat. Transfer* **111**, 2139-2150 (2010)
